# Supplementary material for: Food Neophobia in Children with Autistic Spectrum Disorder (ASD): A Nationwide Study in Brazil
Source: MDPI journal article supplement (doi:10.3390/children9121907), 2022-12-06
Supplement: s1 [file s1]

**Table S1.** Characterization of ASD caregivers (n=593). Brazil, 2020-2021.

|                              | Categories                                                  | Sample |       |
|------------------------------|-------------------------------------------------------------|--------|-------|
|                              |                                                             | n      | %     |
| <b>Caregivers gender</b>     | Male                                                        | 28     | 4.7%  |
|                              | Female                                                      | 565    | 95.3% |
| <b>Degree of kinship</b>     | Mother                                                      | 544    | 91.7% |
|                              | Father                                                      | 24     | 4.0%  |
|                              | Grandparents                                                | 11     | 1.9%  |
|                              | Brothers and sisters                                        | 4      | 0.7%  |
|                              | Uncles                                                      | 6      | 1.0%  |
|                              | Cousin                                                      | 2      | 0.3%  |
|                              | No relationship                                             | 2      | 0.3%  |
| <b>Marital status</b>        | Single                                                      | 101    | 17.0% |
|                              | Married/ stable union                                       | 411    | 69.3% |
|                              | Separate / divorced                                         | 71     | 12.0% |
|                              | Widower                                                     | 10     | 1.7%  |
| <b>Schooling</b>             | from 1st to 4th grade of elementary school (former primary) | 8      | 1.3%  |
|                              | From 5th to 8th grade of elementary school (former gym)     | 20     | 3.4%  |
|                              | High School (2nd degree) incomplete                         | 30     | 5.1%  |
|                              | Complete high school                                        | 163    | 27.5% |
|                              | Higher Education Incomplete                                 | 93     | 15.7% |
|                              | Higher Education Complete                                   | 113    | 19.1% |
|                              | Postgraduate                                                | 128    | 21.6% |
|                              | Master's degree                                             | 31     | 5.2%  |
|                              | Doctorate degree                                            | 4      | 0.7%  |
|                              | Postdoctoral                                                | 3      | 0.5%  |
| <b>Monthly family income</b> | No income                                                   | 32     | 5.4%  |
|                              | Up to 1 MW                                                  | 128    | 21.6% |
|                              | up to 2 MW                                                  | 111    | 18.7% |
|                              | up to 3 MW                                                  | 70     | 11.8% |
|                              | up to 4 MW                                                  | 35     | 5.9%  |
|                              | up to 5 MW                                                  | 36     | 6.1%  |
|                              | up to 6 MW                                                  | 19     | 3.2%  |
|                              | up to 7 MW                                                  | 18     | 3.0%  |
|                              | up to 8 MW                                                  | 15     | 2.5%  |
|                              | up to 9 MW                                                  | 17     | 2.9%  |
|                              | Between 10 and 12 MW                                        | 34     | 5.7%  |
|                              | Between 13 and 15 MW                                        | 12     | 2.0%  |
|                              | Above 15 MW                                                 | 31     | 5.2%  |
|                              | Not informed                                                | 35     | 5.9%  |

**Table S2.** Characterization of ASD children (n=593). Brazil, 2020-2021.

|                                        | Categories                               | Sample |       |
|----------------------------------------|------------------------------------------|--------|-------|
|                                        |                                          | n      | %     |
| <b>Gender</b>                          | Boys                                     | 475    | 80.1% |
|                                        | Girls                                    | 118    | 19.9% |
| <b>Age</b>                             | 4 years old                              | 128    | 21.6% |
|                                        | 5 years old                              | 114    | 19.2% |
|                                        | 6 years old                              | 78     | 13.2% |
|                                        | 7 years old                              | 58     | 9.8%  |
|                                        | 8 years old                              | 60     | 10.1% |
|                                        | 9 years old                              | 53     | 8.9%  |
|                                        | 10 years old                             | 53     | 8.9%  |
|                                        | 11 years old                             | 49     | 8.3%  |
| <b>Diagnoses<sup>a</sup></b>           | Autism spectrum disorder                 | 492    | 83%   |
|                                        | and no other disease                     |        |       |
|                                        | Food allergies                           | 39     | 6.5%  |
|                                        | Food intolerance                         | 35     | 5.9%  |
|                                        | Down's syndrome                          | 9      | 1.5%  |
|                                        | Eating disorders <sup>b</sup>            | 1      | 0.1%  |
|                                        | Attention deficit hyperactivity Disorder | 16     | 2.6%  |
|                                        | Others diagnoses <sup>c</sup>            | 30     | 5.0%  |
| <b>Brazilian regions</b>               | Midwest                                  | 149    | 25.1% |
|                                        | Northeast                                | 99     | 16.7% |
|                                        | North                                    | 33     | 5.6%  |
|                                        | Southeast                                | 222    | 37.4% |
|                                        | South                                    | 90     | 15.2% |
| <b>Housing area</b>                    | Urban area                               | 560    | 94.4% |
|                                        | Rural area                               | 33     | 5.6%  |
| <b>People living in the same house</b> | 2                                        | 53     | 8.9%  |
|                                        | 3                                        | 209    | 35.2% |
|                                        | 4                                        | 208    | 35.1% |
|                                        | 5                                        | 84     | 14.2% |
|                                        | 6                                        | 26     | 4.4%  |
|                                        | 7                                        | 7      | 1.2%  |
|                                        | 8                                        | 5      | 0.8%  |
|                                        | 10                                       | 1      | 0.2%  |

<sup>a</sup> Children may have one or more diagnoses. <sup>b</sup> Anorexia/bulimia/pediatric eating disorder. <sup>c</sup> Such as other syndromes, cerebral palsy, epilepsy, and others.
